# Supplementary material for: Dicyanobenzene passivated perovskite solar cells with enhanced efficiency and stability
Source: Royal Society of Chemistry journal article supplement (doi:10.1039/d3tc03238h), 2023-01-01
Supplement: d3tc03238h1.pdf [file d3tc03238h1.pdf]

## Electronic Supplementary Information

# Dicyanobenzene Passivated Perovskite Solar Cells with Enhanced Efficiency and Stability

*Merlan Nurzhanov,<sup>a</sup> Avi Mathur,<sup>b</sup> Yaoyao Li,<sup>a</sup> Saikiran Khamgaonkar,<sup>b</sup> Sung Jae Jeon,<sup>a</sup> Vivek Maheshwari,<sup>b</sup> Yuning Li<sup>\*a</sup>*

<sup>a</sup> Department of Chemical Engineering and Waterloo Institute for Nanotechnology (WIN), University of Waterloo, 200 University Ave West, Waterloo, Ontario, N2L 3G1, Canada. E-mail: [yuning.li@uwaterloo.ca](mailto:yuning.li@uwaterloo.ca)

<sup>b</sup> Department of Chemistry, Waterloo Institute for Nanotechnology (WIN), University of Waterloo, 200 University Avenue West, Waterloo, Ontario N2L 3G1, Canada

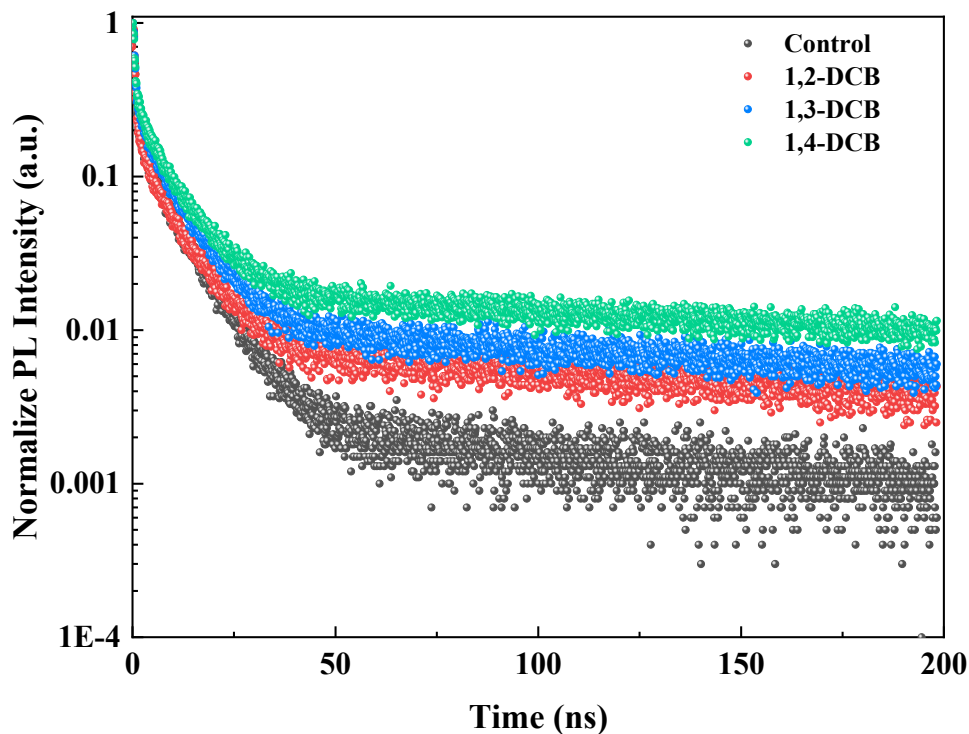

**Figure S1.** Time-resolved photoluminescence (TRPL) spectra of perovskite films without (control) and with DCB passivation

**Table S1.** Energies of DCB isomers,  $\text{PbI}_2$ , and the 1,2-DCB: $\text{PbI}_2$ , 1,3-DCB: $\text{PbI}_2$ , and 1,4-DCB: $\text{PbI}_2$  complexes, along with the binding energies ( $E_b$ 's) of these complexes obtained by energy minimization using the Universal Force Field (UFF) and Merck Molecular Force Field 94 static (MMFF94s) as molecular mechanic functions via Avogadro (version 1.2.0) on the optimized structures of compounds from Gaussian 16 (B3LYP/6-31G(d) basis set).

|                | Energy of DCB<br>( $E_{\text{DCB}}$ ; $\text{kJ mol}^{-1}$ ) | Energy of $\text{PbI}_2$<br>( $E_{\text{PbI}_2}$ ; $\text{kJ mol}^{-1}$ ) | Energy of DCB: $\text{PbI}_2$<br>( $E_{\text{DCB:PbI}_2}$ ; $\text{kJ mol}^{-1}$ ) | Binding Energy ( $E_b = E_{\text{DCB}} + E_{\text{PbI}_2} - E_{\text{DCB:PbI}_2}$ ; $\text{kJ mol}^{-1}$ ) |
|----------------|--------------------------------------------------------------|---------------------------------------------------------------------------|------------------------------------------------------------------------------------|------------------------------------------------------------------------------------------------------------|
| <b>1,4-DCB</b> | 186.911                                                      | $5.05342 \times 10^{-11}$                                                 | 45.6498                                                                            | 141.2612                                                                                                   |
| <b>1,3-DCB</b> | 155.374                                                      | $5.05342 \times 10^{-11}$                                                 | 39.4239                                                                            | 115.9501                                                                                                   |
| <b>1,2-DCB</b> | 115.935                                                      | $5.05342 \times 10^{-11}$                                                 | 45.918                                                                             | 70.017                                                                                                     |

**Table S2.** Photovoltaic performance parameters of PSCs passivated with 1,2-DCB solutions with different concentrations.

| 1,2-DCB<br>conc. | $J_{sc}$ (mA cm <sup>-2</sup> ) |         | $V_{oc}$ (V) |         | FF   |         | PCE (%) |         |
|------------------|---------------------------------|---------|--------------|---------|------|---------|---------|---------|
|                  | Best                            | Average | Best         | Average | Best | Average | Best    | Average |
| w/o              | 21.28                           | 21.20   | 1.07         | 1.05    | 0.80 | 0.77    | 18.33   | 17.59   |
| 1 mg/ml          | 23.41                           | 21.89   | 1.07         | 1.06    | 0.78 | 0.75    | 18.86   | 18.21   |
| 2 mg/ml          | 22.06                           | 21.89   | 1.08         | 1.07    | 0.81 | 0.80    | 19.24   | 18.44   |
| 4 mg/ml          | 21.65                           | 22.90   | 1.08         | 1.04    | 0.81 | 0.75    | 19.12   | 18.15   |

**Table S3.** Photovoltaic performance parameters of PSCs passivated with 1,3-DCB solutions with different concentrations.

| 1,3-DCB<br>conc. | $J_{sc}$ (mA cm <sup>-2</sup> ) |         | $V_{oc}$ (V) |         | FF   |         | PCE (%) |         |
|------------------|---------------------------------|---------|--------------|---------|------|---------|---------|---------|
|                  | Best                            | Average | Best         | Average | Best | Average | Best    | Average |
| w/o              | 21.23                           | 20.37   | 1.06         | 1.06    | 0.80 | 0.77    | 18.12   | 17.44   |
| 1 mg/ml          | 22.34                           | 21.73   | 1.07         | 1.06    | 0.80 | 0.79    | 19.14   | 18.61   |
| 2 mg/ml          | 22.80                           | 22.23   | 1.09         | 1.08    | 0.83 | 0.82    | 21.07   | 19.87   |
| 4 mg/ml          | 22.23                           | 22.18   | 1.07         | 1.07    | 0.83 | 0.80    | 20.02   | 19.08   |

**Table S4.** Photovoltaic performance parameters of PSCs passivated with 1,4-DCB solutions with different concentrations.

| 1,4-DCB conc. | $J_{sc}$ (mA cm <sup>-2</sup> ) |         | $V_{oc}$ (V) |         | FF   |         | PCE (%) |         |
|---------------|---------------------------------|---------|--------------|---------|------|---------|---------|---------|
|               | Best                            | Average | Best         | Average | Best | Average | Best    | Average |
| w/o           | 21.89                           | 21.08   | 1.07         | 1.05    | 0.77 | 0.75    | 18.25   | 17.60   |
| 1 mg/ml       | 21.42                           | 21.01   | 1.08         | 1.06    | 0.82 | 0.80    | 19.49   | 18.35   |
| 2 mg/ml       | 23.18                           | 22.07   | 1.09         | 1.08    | 0.82 | 0.81    | 20.28   | 19.56   |
| 4 mg/ml       | 22.30                           | 22.21   | 1.08         | 1.06    | 0.82 | 0.80    | 20.10   | 18.91   |

## References

1. D. Yang, R. Yang, X. Ren, X. Zhu, Z. Yang, C. Li and S. F. Liu, *Adv. Mater.*, 2016, **28**, 5206–5213.
